# Supplementary material for: Absolute quantification and characterization of oxylipins in lupus nephritis and systemic lupus erythematosus
Source: Front Immunol. 2022 Oct 6;13:964901. doi: 10.3389/fimmu.2022.964901 (PMC9582137; doi:10.3389/fimmu.2022.964901)
Supplement: Supplementary file 5 [file Table_5.xlsx]

## Sheet: Sheet1
Supplementary table S5. Significantly changed oxylipins in serum of SLE patients versus healthy controls
Compounds	Mean-Control	Mean-SLE	FC(SLE/Control)	Pvalue	Qvalue
AA	2235.09	1506.39	0.673973	1.77201e-14	1.63025e-12
9-OxoODE	2.77507	1.59627	0.575218	1.47685e-12	6.79353e-11
5-OxoETE	0.900145	0.393269	0.436895	5.74421e-10	1.76156e-08
15-OxoEDE	2.62218	0.915808	0.349254	1.48282e-07	3.41049e-06
11,12-DiHETrE	0.171408	0.123037	0.717805	1.97637e-06	3.63652e-05
LTB4	0.16693	0.0594866	0.356357	4.29084e-06	6.57928e-05
9,10-DiHOME	6.66086	2.86495	0.430116	1.87354e-05	0.000215457
AdA	169.517	104.218	0.614797	1.68232e-05	0.000221106
DHA	1320.01	898.979	0.681037	6.79694e-05	0.000694798
15-HETE	0.549777	0.291227	0.529719	9.69174e-05	0.00089164
4-HDoHE	0.42248	0.255276	0.604233	0.000134007	0.00112079
13-OxoODE	1.78926	1.30335	0.72843	0.000152014	0.00116544
12,13-DiHOME	3.57151	1.92532	0.539076	0.000432658	0.00306188
5-HETrE	0.0215851	0.0116069	0.53773	0.000500413	0.00328843
PGF3α	0.709989	0.37537	0.528698	0.00161448	0.00990214
PGF2α	0.807049	0.424403	0.525871	0.00223195	0.0128337
LTE4	0.254574	0.150033	0.58935	0.00375727	0.0203335
TXB2	20.5099	15.3283	0.74736	0.00533137	0.0272492
RvD5	0.0304388	0.0576659	1.89449	0.0058478	0.0283157
13-HDoHE	0.0976883	0.076021	0.7782	0.00672984	0.0309572
PGD1	0.327285	0.198988	0.607996	0.0135036	0.0591587
14,15-DiHETrE	0.178429	0.14397	0.806875	0.0141709	0.05926
14-HDoHE	16.1642	22.4239	1.38726	0.0256949	0.10278
13(γ)-HOTrE	0.104163	0.0752263	0.722198	0.0351851	0.134876
PGE1	0.115452	0.0923211	0.799647	0.0375931	0.138342
